# Supplementary material
Source: PubMed Central journal article supplement (PMC6545828)
Supplement: 2018.208082_PATNAIK_SUPPL.pdf [file 2018.208082_PATNAIK_SUPPL.pdf]

**Clinical correlates, prognostic impact and survival outcomes in chronic myelomonocytic leukemia patients with the JAK2V617F mutation**

---

*Mrinal M. Patnaik,<sup>1</sup> Prateek A. Pophali,<sup>1</sup> Terra L. Lasho,<sup>1</sup> Christy M. Finke,<sup>1</sup> Pedro Horna,<sup>2</sup> Rhett P. Ketterling,<sup>3</sup> Naseema Gangat,<sup>1</sup> Abhishek A. Mangaonkar,<sup>1</sup> Animesh Pardanani<sup>1</sup> and Ayalew Tefferi<sup>1</sup>*

<sup>1</sup>Division of Hematology, Department of Medicine; <sup>2</sup>Division of Hematopathology, Department of Laboratory Medicine and Pathology and <sup>3</sup>Division of Cyto-genetics, Department of Laboratory Medicine and Pathology, Mayo Clinic, Rochester, MN, USA

Correspondence: MRINAL M. PATNAIK.

patnaik.mrinal@mayo.edu

doi:10.3324/haematol.2018.208082

**Supplementary table one: Clinical and laboratory characteristics of 92 patients with proliferative chronic myelomonocytic leukemia, stratified by, as to whether or not, they had the *JAK2V617F* mutation versus other cell signaling mutations (*CSF3R*, *CBL*, *KRAS*, *NRAS*, *PTPN11*, *FLT3*, *KIT*)**

| Variables                                          | MP-CMML patients with <i>JAK2</i> mutation (n=23) | MP-CMML patients with other cell signaling mutations (n=69) | P value      |
|----------------------------------------------------|---------------------------------------------------|-------------------------------------------------------------|--------------|
| Age in years; median (range)                       | 72 (61-85)                                        | 69 (20-90)                                                  | 0.14         |
| Sex (Male); n (%)                                  | 16 (70)                                           | 42 (61)                                                     | 0.44         |
| Hemoglobin g/dL; median (range)                    | 12.1 (7.2-16.9)                                   | 11.3 (6.4-15.4)                                             | <b>0.04</b>  |
| Hematocrit; median (range)                         | 37 (23-55)                                        | 35.2 (20-47)                                                | 0.31         |
| WBC x 10 <sup>9</sup> /L; median (range)           | 23.1 (11.9-131)                                   | 29.1 (13-185.7)                                             | 0.08         |
| AMC x 10 <sup>9</sup> /L; median (range)           | 4.2 (1.2-36.4)                                    | 6 (1.3-37.8)                                                | 0.06         |
| Platelets x 10 <sup>9</sup> /L; median (range)     | 201 (16-840)                                      | 107 (18-682)                                                | <b>0.02</b>  |
| Presence of immature myeloid cells; n (%)          | 14 (61)                                           | 57 (84)                                                     | <b>0.03</b>  |
| Presence of leuko-erythroblastosis, Yes; n (%)     | 16/23 (70)                                        | 56/64 (87)                                                  | 0.06         |
| PB blasts %; median (range)                        | 0 (0-10)                                          | 0 (0-19)                                                    | <b>0.01</b>  |
| BM blasts %; median (range)                        | 2 (0-15)                                          | 4 (0-18)                                                    | 0.21         |
| Lactate dehydrogenase; median (range)              | 364 (137-971)                                     | 250 (135-986)                                               | <b>0.02</b>  |
| 2016 WHO CMML morphological subtypes; n (%)        |                                                   |                                                             | 0.25         |
| CMML-0                                             | 14 (61)                                           | 33 (48)                                                     |              |
| CMML-1                                             | 7 (30)                                            | 20 (29)                                                     |              |
| CMML-2                                             | 2 (9)                                             | 16 (23)                                                     |              |
| Myeloproliferative features:                       |                                                   |                                                             |              |
| a. BM cellularity; median (range)                  | 90 (40-100)                                       | 90 (40-100)                                                 | 0.11         |
| b. Megakaryocytic atypia; n (%)                    | 16/23 (70)                                        | 50/62 (81)                                                  | 0.28         |
| c. Bone marrow fibrosis; n (%)                     | 9/13 (69)                                         | 16/32 (50)                                                  | 0.23         |
| i. Grade 1                                         | 8 (61)                                            | 10 (31)                                                     |              |
| ii. Grade 2                                        | 0 (0)                                             | 2 (6)                                                       |              |
| iii. Grade 3                                       | 0 (0)                                             | 3 (9)                                                       |              |
| iv. Grade 4                                        | 1 (8)                                             | 1 (3)                                                       |              |
| d. Palpable splenomegaly; n (%)                    | 11/23 (48)                                        | 21/64 (33)                                                  | 0.09         |
| Thrombotic events before diagnosis; n (%)          | 7 (30)                                            | 10 (14)                                                     | 0.10         |
| a. Arterial thrombosis                             | 6 (26)                                            | 9 (13)                                                      | 0.15         |
| b. Venous thrombosis                               | 1 (4)                                             | 1 (1)                                                       | 0.44         |
| Thrombotic events after diagnosis; n (%)           | 2 (9)                                             | 5 (7)                                                       | 0.82         |
| a. Arterial thrombosis                             | 2 (9)                                             | 4 (6)                                                       | 0.64         |
| b. Venous thrombosis                               | 0 (0)                                             | 1 (1)                                                       | 0.44         |
| Abnormal cytogenetics; n (%)                       | n = 21<br>1 (5)                                   | n = 68<br>26 (38)                                           | <b>0.001</b> |
| Mayo-French cytogenetic risk stratification; n (%) | n = 21                                            | n = 68                                                      | <b>0.009</b> |
| Low                                                | 20 (95)                                           | 45 (66)                                                     |              |
| Intermediate                                       | 1 (5)                                             | 16 (24)                                                     |              |
| High                                               | 0 (0)                                             | 7 (10)                                                      |              |
| Mayo prognostic model; n (%)                       | n = 23                                            | n = 68                                                      | <b>0.008</b> |

|                                                   |               |               |               |
|---------------------------------------------------|---------------|---------------|---------------|
| Low                                               | 6 (26)        | 4 (6)         |               |
| Intermediate                                      | 8 (35)        | 15 (22)       |               |
| High                                              | 9 (39)        | 49 (72)       |               |
| Next generation sequencing analysis; <i>n</i> (%) |               |               |               |
| <b>1. Epigenetic regulators</b>                   |               |               |               |
| <i>TET2</i>                                       | 16 (76)       | 31 (45)       | <b>0.01</b>   |
| <i>DNMT3A</i>                                     | 1 (5)         | 5 (7)         | 0.68          |
| <i>IDH1</i>                                       | 0 (0)         | 0 (0)         | .             |
| <i>IDH2</i>                                       | 1 (5)         | 6 (9)         | 0.53          |
| <b>2. Chromatin regulators</b>                    |               |               |               |
| <i>ASXL1</i>                                      | 12 (55)       | 43 (62)       | 0.52          |
| <i>EZH2</i>                                       | 3 (14)        | 3 (4)         | 0.13          |
| <b>3. Transcription factors</b>                   |               |               |               |
| <i>RUNX1</i>                                      | 4 (19)        | 5 (7)         | 0.14          |
| <i>BCOR</i>                                       | 0 (0)         | 0 (0)         | .             |
| <b>4. Spliceosome components</b>                  |               |               |               |
| <i>SF3B1</i>                                      | 1 (5)         | 0 (0)         | 0.08          |
| <i>SRSF2</i>                                      | 10 (45)       | 32 (46)       | 0.93          |
| <i>U2AF1</i>                                      | 1 (5)         | 6 (9)         | 0.53          |
| <i>ZRSR2</i>                                      | 0 (0)         | 1 (1)         | 0.46          |
| <b>5. Cell signaling</b>                          |               |               |               |
| <i>JAK2</i>                                       | 23 (100)      | 0 (0)         | <b>0.0001</b> |
| <i>MPL</i>                                        | 0 (0)         | 0 (0)         | .             |
| <i>CALR</i>                                       | 0 (0)         | 0 (0)         | .             |
| <i>CBL</i>                                        | 1 (5)         | 24 (35)       | <b>0.002</b>  |
| <i>KRAS</i>                                       | 1 (5)         | 6 (9)         | 0.53          |
| <i>NRAS</i>                                       | 1 (5)         | 30 (43)       | <b>0.0003</b> |
| <i>PTPN11</i>                                     | 1 (5)         | 5 (7)         | 0.68          |
| <i>CSF3R</i>                                      | 0 (0)         | 3 (4)         | 0.19          |
| <i>C-KIT</i>                                      | 0 (0)         | 5 (7)         | 0.09          |
| <i>FLT3TKD</i>                                    | 1 (5)         | 5 (7)         | 0.67          |
| <i>NPM1</i>                                       | 0 (0)         | 0 (0)         | .             |
| <i>SH2B3</i>                                      | 1 (5)         | 0 (0)         | 0.09          |
| <b>6. Tumor suppressor genes</b>                  |               |               |               |
| <i>Tp53</i>                                       | 1 (5)         | 1 (1)         | 0.40          |
| <b>7. Others</b>                                  |               |               |               |
| <i>SETBP1</i>                                     | 2 (9)         | 15 (22)       | 0.18          |
| Mayo Molecular Model; <i>n</i> (%)                |               |               |               |
| Low                                               | <i>n</i> = 22 | <i>n</i> = 68 | <b>0.01</b>   |
| Intermediate-1                                    | 3 (14)        | 1 (1)         |               |
| Intermedaite-2                                    | 6 (27)        | 6 (9)         |               |
| High                                              | 8 (36)        | 30 (44)       |               |
|                                                   | 5 (23)        | 31 (46)       |               |
| Deaths; <i>n</i> (%)                              |               |               |               |
|                                                   | 15 (65)       | 45 (65)       | 1.0           |
| Overall survival in months; median (95% CI)       |               |               |               |
|                                                   | 29 (18-42)    | 20 (13-33)    | 0.61          |
| Leukemic transformation; <i>n</i> (%)             |               |               |               |
|                                                   | 2 (9)         | 16 (23)       | 0.10          |
| Follow- up in months; median (range)              |               |               |               |
|                                                   | 54 (0-100)    | 54 (0-158)    | 0.94          |

The bold values represent *p* values that are statistically significant; *p* < 0.05.

**Key:** CMML: Chronic Myelomonocytic Leukemia, MP: Myeloproliferative, WBC: White Blood Cell count; AMC: Absolute Monocyte Count; PB: Peripheral Blood; BM: Bone Marrow; WHO: World Health Organization; CI: Confidence Interval

**Supplementary table two: Clinical and laboratory characteristics of 30 patients with the *JAK2V617F* mutant chronic myelomonocytic leukemia (CMML), compared to 73 patients with primary myelofibrosis (PMF) with monocytosis**

| Variables                                      | CMML patients with the <i>JAK2V617F</i> mutation (n=30) | PMF patients with monocytosis (n=73) | P value       |
|------------------------------------------------|---------------------------------------------------------|--------------------------------------|---------------|
| Age in years; median (range)                   | 72 (61-85)                                              | 69 (35-82)                           | <b>0.03</b>   |
| Sex (Male); n (%)                              | 21 (70)                                                 | 47 (64)                              | 0.58          |
| Hemoglobin g/dL; median (range)                | 12.1 (7.2-16.9)                                         | 10.8 (7.7-16.3)                      | <b>0.03</b>   |
| WBC x 10 <sup>9</sup> /L; median (range)       | 15.7 (4.1-131)                                          | 21.7 (6.8-236.1)                     | 0.13          |
| AMC x 10 <sup>9</sup> /L; median (range)       | 3.2 (1.2-36.4)                                          | 1.5 (1-13.5)                         | <b>0.03</b>   |
| Platelets x 10 <sup>9</sup> /L; median (range) | 162 (16-840)                                            | 196 (14-1354)                        | 0.64          |
| PB blasts %; median (range)                    | 0 (0-10)                                                | 1 (0-16)                             | <b>0.0001</b> |
| Lactate dehydrogenase; median (range)          | 378 (137-971)                                           | 618 (195-2034)                       | <b>0.0043</b> |
| Bone marrow fibrosis; n (%)                    | N=18                                                    | N=71                                 |               |
| a. Grade 1                                     | 11 (61)                                                 | 6 (8)                                | <b>0.0001</b> |
| b. Grade ≥2                                    | 1 (6)                                                   | 65 (92)                              | <b>0.0001</b> |
| Palpable splenomegaly; n (%)                   | 13/30 (43)                                              | 57/72 (79)                           | <b>0.0005</b> |
| Thrombotic events before diagnosis; n (%)      | 8 (27)                                                  | 13 (18)                              | 0.31          |
| c. Arterial thrombosis                         | 6 (20)                                                  | 8 (11)                               | 0.23          |
| d. Venous thrombosis                           | 2 (7)                                                   | 5 (7)                                | 0.97          |
| Thrombotic events after diagnosis; n (%)       | 2 (7)                                                   | 10 (13)                              | 0.21          |
| c. Arterial thrombosis                         | 2 (7)                                                   | 6 (8)                                | 0.78          |
| d. Venous thrombosis                           | 0 (0)                                                   | 4 (5)                                | 0.09          |
| Abnormal cytogenetics n (%)                    | n = 28<br>1 (4)                                         | n = 72<br>26 (36)                    | <b>0.0002</b> |
| Next generation sequencing analysis; n (%)     |                                                         | N=21                                 |               |
| <b>8. Epigenetic regulators</b>                |                                                         |                                      |               |
| <i>TET2</i>                                    | 20 (67)                                                 | 6 (29)                               | <b>0.001</b>  |
| <i>DNMT3A</i>                                  | 1 (4)                                                   | 2 (10)                               | 0.39          |
| <i>IDH1</i>                                    | 0 (0)                                                   | 1 (5)                                | 0.19          |
| <i>IDH2</i>                                    | 2 (7)                                                   | 5 (22)                               | 0.12          |
| <b>9. Chromatin regulators</b>                 |                                                         |                                      |               |
| <i>ASXL1</i>                                   | 14 (48)                                                 | 9 (43)                               | 0.70          |
| <i>EZH2</i>                                    | 3 (10)                                                  | 0 (0)                                | 0.06          |
| <b>10. Transcription factors</b>               |                                                         |                                      |               |
| <i>RUNX1</i>                                   | 5 (18)                                                  | 2 (10)                               | 0.40          |
| <i>BCOR</i>                                    |                                                         |                                      |               |
| <b>11. Spliceosome components</b>              |                                                         |                                      |               |
| <i>SF3B1</i>                                   | 2 (7)                                                   | 2 (10)                               | 0.76          |
| <i>SRSF2</i>                                   | 14 (48)                                                 | 5 (24)                               | 0.07          |
| <i>U2AF1</i>                                   | 1 (4)                                                   | 2 (10)                               | 0.39          |
| <i>ZRSR2</i>                                   | 0 (0)                                                   | 4 (19)                               | <b>0.007</b>  |
| <b>12. Cell signaling</b>                      |                                                         |                                      |               |
| <i>JAK2V617F</i>                               | 30 (100)                                                | 48/73 (66)                           | <b>0.0001</b> |
| Type 1 <i>CALR</i>                             | 0 (0)                                                   | 11/73 (15)                           | <b>0.004</b>  |
| Type 2 <i>CALR</i>                             | 0 (0)                                                   | 3/73 (4)                             | 0.14          |

|                                             |            |              |               |
|---------------------------------------------|------------|--------------|---------------|
| <i>MPL</i>                                  | 0 (0)      | 7/73 (10)    | <b>0.03</b>   |
| <i>CBL</i>                                  | 0 (0)      | 1 (4)        | 0.28          |
| <i>KRAS</i>                                 | 1 (4)      | 11 (4)       | 0.93          |
| <i>NRAS</i>                                 | 2 (7)      | 3 (14)       | 0.41          |
| <i>PTPN11</i>                               | 1 (4)      | 1 (5)        | 0.83          |
| <i>CSF3R</i>                                | 0 (0)      | 0 (0)        | .             |
| <i>C-KIT</i>                                | 1 (4)      | 0 (0)        | 0.28          |
| <i>FLT3TKD</i>                              | 1 (4)      | 0 (0)        | 0.28          |
| <i>NPM1</i>                                 | 0 (0)      | 1 (5)        | 0.18          |
| <b>13. Tumor suppressor genes</b>           |            |              |               |
| <i>Tp53</i>                                 | 1 (4)      | 1 (5)        | 0.83          |
| <b>14. Others</b>                           |            |              |               |
| <i>SETBP1</i>                               | 3 (11)     | 2 (10)       | 0.89          |
| <b>Risk stratification</b>                  | <b>MMM</b> | <b>MIPPS</b> | 0.87          |
| Low                                         | 4 (14)     | 6 (8)        |               |
| Intermediate-1                              | 9 (31)     | 25 (35)      |               |
| Intermediate-2                              | 11 (38)    | 19 (40)      |               |
| High                                        | 5 (17)     | 12 (17)      |               |
| Deaths; <i>n</i> (%)                        | 16 (53)    | 63 (86)      | <b>0.0005</b> |
| Leukemic transformation; <i>n</i> (%)       | 3 (10)     | 11 (15)      | 0.48          |
| Overall survival in months; median (95% CI) | 31 (28-64) | 27 (21-36)   | 0.39          |

The bold values represent *p* values that are statistically significant;  $p < 0.05$ .

**Key:** CMML: Chronic Myelomonocytic Leukemia; PMF: Primary Myelofibrosis; WBC: White Blood Cell count; AMC: Absolute Monocyte Count; PB: Peripheral Blood; WHO: World Health Organization; MMM: Mayo Molecular Model for CMML prognostication; MIPPS: Mutation enhanced International Prognostic Scoring for PMF; CI: Confidence Interval
