# Supplementary material
Source: PubMed Central journal article supplement (PMC6545828)
Supplement: 2018_208082-Disclosures_and_Contributions.pdf [file 2018_208082-Disclosures_and_Contributions.pdf]

Haematologica  
HAEMATOL/2018/208082  
Version 3

Clinical correlates, prognostic impact and survival outcomes in chronic myelomonocytic leukemia patients with the JAK2V617F mutation

Mrinal M. Patnaik, Prateek A. Pophali, Terra L. Lasho, Christy M. Finke, Pedro Horna, Rhett P. Ketterling, Naseema Gangat, Abhishek A. Mangaonkar, Animesh Pardanani, and Ayalew Tefferi

Disclosures: Mrinal Patnaik: Mayo Clinic has received research funding on my behalf from Stem Line Therapeutics.

Contributions: PP, TL, CF, PH, AM performed research. MP and PP performed data analysis. MP wrote the manuscript. RK, NG, AP and AT supervised the study and provided valuable inputs.
